# Supplementary material for: Repat33 Acts as a Downstream Component of Eicosanoid Signaling Pathway Mediating Immune Responses of Spodoptera exigua, a Lepidopteran Insect
Source: MDPI journal article supplement (doi:10.3390/insects12050449), 2021-05-14
Supplement: s1 [file s1]

**Table S1.** List of primers used in this study

| Genes                    | Orientation | Sequence (5' - 3')                                       | Uses    | Annealing temperature (°C) | Expected size (bp) |
|--------------------------|-------------|----------------------------------------------------------|---------|----------------------------|--------------------|
| Repat33                  | Forward     | GTCTCTGTGGACACATGTTACT                                   | RT-PCR  | 52.0                       | 297                |
|                          | Reverse     | CCCTTTCCTTCTCACTCTTC                                     | RT-qPCR |                            |                    |
| T7+Repat33               | Forward     | <u>TAATACGACTCACTATAGGGAGA</u><br>GTCTCTGTGGACACATGTTACT | RNAi    | 65.0                       | 343                |
|                          | Reverse     | <u>TAATACGACTCACTATAGGGAGA</u><br>CCCTTTCCTTCTCACTCTTC   |         |                            |                    |
| Repat46                  | Forward     | GTTGTGTCGCAGTTGGCTAC                                     | RT-PCR  | 54.4                       | 167                |
|                          | Reverse     | TACCTCTTGCCTTGCACCA                                      | RT-qPCR |                            |                    |
| Repat20                  | Forward     | AAAACCTCCCCACTGGAACG                                     | RT-PCR  | 54.4                       | 220                |
|                          | Reverse     | CTACCGCCTAGGGTAGGGTT                                     | RT-qPCR |                            |                    |
| Repat12                  | Forward     | CAGTCTGCTATGATGCCGCT                                     | RT-PCR  | 54.4                       | 293                |
|                          | Reverse     | CTCCGCAGTGGAGAACGAA                                      | RT-qPCR |                            |                    |
| Repat16                  | Forward     | AGCTGCTATGGAAGTGCTG                                      | RT-PCR  | 54.4                       | 227                |
|                          | Reverse     | TGCCGGGAGATCCCTCATAA                                     | RT-qPCR |                            |                    |
| Repat30                  | Forward     | CGTTTTCAAAGCCGACGAGG                                     | RT-PCR  | 54.4                       | 212                |
|                          | Reverse     | CCCTTTGGCTCTTGAGCTTG                                     | RT-qPCR |                            |                    |
| A ribosomal protein RL32 | Forward     | ATGCCCAACATTGGTTACGG                                     | RT-PCR  | 52.0                       | 240                |
|                          | Reverse     | TTCGTTCTCCTGGCTGCGGA                                     | RT-qPCR |                            |                    |
| Apolipoprotein III       | Forward     | AGTGTGCGCAAGTTGTTTCGTG                                   | RT-qPCR | 52.0                       | 420                |
|                          | Reverse     | CTCCTGCGCGGTGTTCTGCA                                     |         |                            |                    |
| Attacin 1                | Forward     | GCTTTCCTCTCCAGGAATATG                                    | RT-qPCR | 52.0                       | 276                |
|                          | Reverse     | CCTTAGAGTAAATCCAGTGG                                     |         |                            |                    |
| Attacin 2                | Forward     | TCCCGAATGTGCCCAACTTC                                     | RT-qPCR | 52.0                       | 254                |
|                          | Reverse     | GAAAGATCTGCCGAAAGTAAG                                    |         |                            |                    |
| Defensin                 | Forward     | ATGGGTGTTAAGGTAATAAATGTG                                 | RT-qPCR | 52.0                       | 303                |
|                          | Reverse     | GCAACTACATGTATGACTAACGC                                  |         |                            |                    |
| Gallerimycin             | Forward     | TCAGTCATGAAAGCTTGCGTA                                    | RT-qPCR | 52.0                       | 222                |
|                          | Reverse     | TCGCACACATTGGCATCCATTC                                   |         |                            |                    |
| Gloverin                 | Forward     | CGTGGACATCTTCAGGGCC                                      | RT-qPCR | 52.0                       | 277                |
|                          | Reverse     | GTCGTGTTCAATGCCACC                                       |         |                            |                    |
| Lysozyme                 | Forward     | ATGCAAAAGCTAACGGTTTTC                                    | RT-qPCR | 52.0                       | 385                |
|                          | Reverse     | GATTCTTCCATCCATACCAG                                     |         |                            |                    |
| Transferrin 1            | Forward     | GTCCCTCTCTGTCCTGAAGG                                     | RT-qPCR | 52.0                       | 370                |
|                          | Reverse     | CAGAAACACGAAGAAAGATGG                                    |         |                            |                    |
| Transferrin 2            | Forward     | GATGTTCTGGCGCAGCTGTC                                     | RT-qPCR | 52.0                       | 288                |
|                          | Reverse     | CCGGCTGAACGCAACACAG                                      |         |                            |                    |
| Cecropin                 | Forward     | ATCGTTTAGCTTCGTGTTTCGC                                   | RT-qPCR | 52.0                       | 251                |
|                          | Reverse     | CTTCTTTTACCACACGGTTG                                     |         |                            |                    |
